# Supplementary material for: Elemental and Isotopic Characterization of Tobacco from Umbria
Source: PubMed Central journal article supplement (PMC8004217; doi:10.3390/metabo11030186), 2021-03-22

**Figure S1.** Distribution of isotopic values (expressed in  $\delta$  ‰) and elemental composition (expressed in g or mg or  $\mu\text{g}/\text{kg}$ , depending on the element).

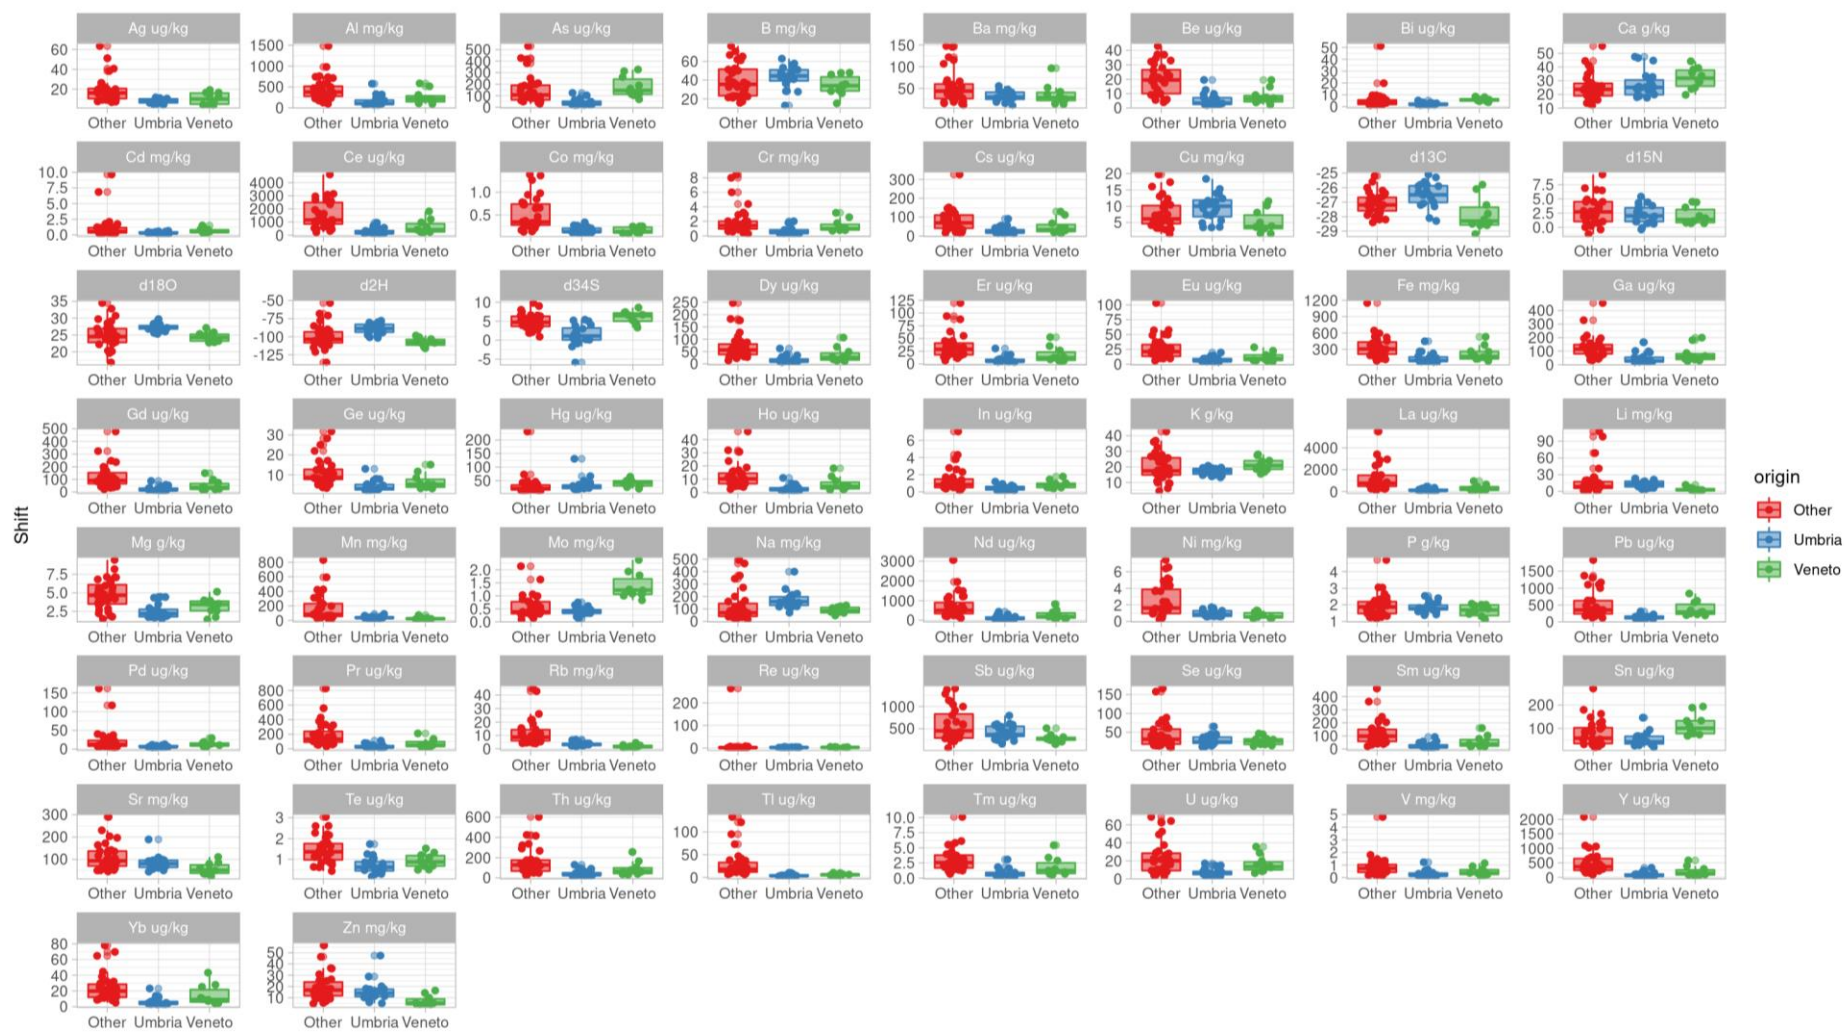

Supplement: metabolites-11-00186-s001.pdf [file metabolites-11-00186-s001.pdf]
